# Supplementary figures and images for: Study of a Late Bronze Age Casting Mould and Its Black Residue by 3D Imaging, pXRF, SEM-EDS, Micro-FTIR and Micro-Raman
Source: MDPI journal article supplement (doi:10.3390/heritage4040165), 2021-09-30

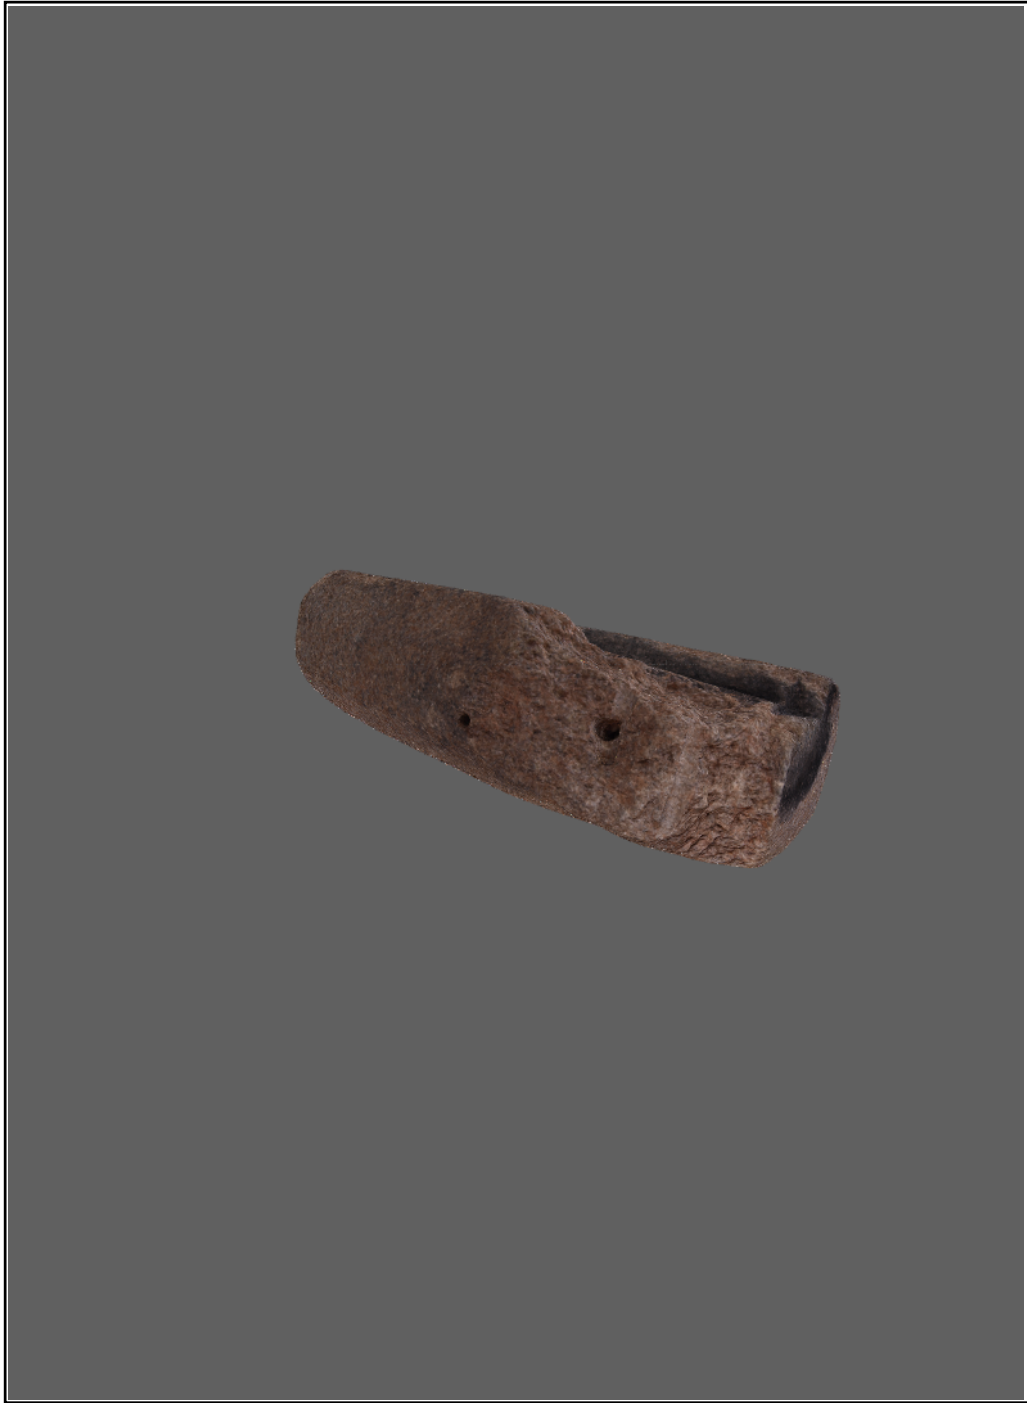

Figure S1: 3D interactive reconstruction of the mold

Supplement: s1 [file s1]
